# Supplementary material for: Fucoxanthin Prevents Pancreatic Tumorigenesis in C57BL/6J Mice That Received Allogenic and Orthotopic Transplants of Cancer Cells
Source: MDPI journal article supplement (doi:10.3390/ijms222413620), 2021-12-19
Supplement: s1 [file s1]

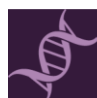

**Supplementary Table S1.** Profile of upregulated genes (< 2.0 and ≥ 1.5-fold change) in pancreatic tumors of mice treated with fucoxanthin (Fx).<sup>1</sup>

| Gene symbol            | Description                                                | Fold change <sup>2</sup> | p-value <sup>3</sup> |
|------------------------|------------------------------------------------------------|--------------------------|----------------------|
| <i>Mlph</i>            | Melanophilin                                               | 1.99                     | 0.0014               |
| <i>Apln</i>            | Apelin                                                     | 1.98                     | 0.0298               |
| <i>Trim30c</i>         | Tripartite motif-containing 30C                            | 1.97                     | 0.0073               |
| <i>Trem1</i>           | Triggering receptor expressed on myeloid cells 1           | 1.94                     | 0.0116               |
| <i>Elf3</i>            | E74-like factor 3                                          | 1.84                     | 0.0011               |
| <i>Fancg</i>           | Fanconi anemia, complementation group G                    | 1.80                     | 0.0023               |
| <i>Fam3b</i>           | Family with sequence similarity 3, member B                | 1.79                     | 0.0333               |
| <i>Gpr84</i>           | G protein-coupled receptor 84                              | 1.78                     | 0.043                |
| <i>Cd55b</i>           | CD55 molecule, decay accelerating factor for complement B  | 1.77                     | 0.0023               |
| <i>Arl14epl</i>        | ADP-ribosylation factor-like 14 effector protein-like      | 1.77                     | 0.0145               |
| <i>Dmd</i>             | Dystrophin, muscular dystrophy                             | 1.76                     | 0.0328               |
| <i>Tnfrsf21</i>        | Tumor necrosis factor receptor superfamily, member 21      | 1.76                     | 0.0066               |
| <i>Hydin</i>           | HYDIN, axonemal central pair apparatus protein             | 1.76                     | 0.0119               |
| <i>Rorc</i>            | RAR-related orphan receptor gamma                          | 1.74                     | 0.0418               |
| <i>Il24</i>            | Interleukin 24                                             | 1.73                     | 0.007                |
| <i>Per1</i>            | Period circadian clock 1                                   | 1.73                     | 0.001                |
| <i>Trim13</i>          | Tripartite motif-containing 13                             | 1.70                     | 0.0188               |
| <i>Tcaim</i>           | T cell activation inhibitor, mitochondrial                 | 1.70                     | 0.027                |
| <i>Olfr6</i>           | Olfactory receptor 6                                       | 1.69                     | 0.0339               |
| <i>Olfr1277</i>        | Olfactory receptor 1277                                    | 1.69                     | 0.0381               |
| <i>Leng9</i>           | Leukocyte receptor cluster (LRC) member 9                  | 1.68                     | 0.0155               |
| <i>Adam8</i>           | A disintegrin and metallopeptidase domain 8                | 1.68                     | 0.0367               |
| <i>Slc35f1</i>         | Solute carrier family 35, member F1                        | 1.68                     | 0.0054               |
| <i>F10</i>             | Coagulation factor X                                       | 1.66                     | 0.0069               |
| <i>Defb8</i>           | Defensin beta 8                                            | 1.66                     | 0.0099               |
| <i>Fzd5</i>            | Frizzled homolog 5 (Drosophila)                            | 1.66                     | 0.0046               |
| <i>Nlrp10</i>          | NLR family, pyrin domain containing 10                     | 1.65                     | 0.0148               |
| <i>Hspa1b; Hspa1a</i>  | Heat shock protein 1B; heat shock protein 1A               | 1.65                     | 0.0234               |
| <i>Cwh43</i>           | Cell wall biogenesis 43 C-terminal homolog (S. cerevisiae) | 1.64                     | 0.0226               |
| <i>Cxcl5</i>           | Chemokine (C-X-C motif) ligand 5                           | 1.64                     | 0.0397               |
| <i>Olfr640</i>         | Olfactory receptor 640                                     | 1.63                     | 0.0041               |
| <i>Crisp3</i>          | Cysteine-rich secretory protein 3                          | 1.63                     | 0.0007               |
| <i>BC100530; Stfa3</i> | cDNA sequence BC100530; stefin A3                          | 1.63                     | 0.0203               |
| <i>Kctd1</i>           | Potassium channel tetramerisation domain containing 1      | 1.63                     | 0.0076               |
| <i>Osm</i>             | Oncostatin M                                               | 1.62                     | 0.0225               |
| <i>Car2</i>            | Carbonic anhydrase 2                                       | 1.62                     | 0.004                |
| <i>Ms4a13</i>          | Membrane-spanning 4-domains, subfamily A, member 13        | 1.61                     | 0.0114               |
| <i>Hsph1</i>           | Heat shock 105kDa/110kDa protein 1                         | 1.61                     | 0.0254               |
| <i>Igsf9b</i>          | Immunoglobulin superfamily, member 9B                      | 1.60                     | 0.0176               |

|                      |                                                                                          |      |        |
|----------------------|------------------------------------------------------------------------------------------|------|--------|
| <i>Gnrh1</i>         | Gonadotropin releasing hormone 1                                                         | 1.59 | 0.0081 |
| <i>Aqp7</i>          | Aquaporin 7                                                                              | 1.59 | 0.0114 |
| <i>Spink8</i>        | Serine peptidase inhibitor, Kazal type 8                                                 | 1.58 | 0.0339 |
| <i>Bhlhe40</i>       | Basic helix-loop-helix family, member e40                                                | 1.57 | 0.0248 |
| <i>Bche</i>          | Butyrylcholinesterase                                                                    | 1.57 | 0.0308 |
| <i>Prrg3</i>         | Proline rich Gla (G-carboxyglutamic acid) 3 (transmembrane)                              | 1.55 | 0.005  |
| <i>Banp</i>          | BTG3 associated nuclear protein                                                          | 1.54 | 0.0383 |
| <i>Cdhr2</i>         | Cadherin-related family member 2                                                         | 1.54 | 0.0074 |
| <i>Ppp2r4</i>        | Protein phosphatase 2A activator, regulatory subunit B                                   | 1.54 | 0.0031 |
| <i>Slc29a2</i>       | Solute carrier family 29 (nucleoside transporters), member 2                             | 1.54 | 0.0046 |
| <i>Tcirg1</i>        | T cell, immune regulator 1, ATPase, H <sup>+</sup> transporting, lysosomal V0 protein A3 | 1.54 | 0.0248 |
| <i>4933417A18Rik</i> | RIKEN cDNA 4933417A18 gene                                                               | 1.54 | 0.0478 |
| <i>Zbtb40</i>        | Zinc finger and BTB domain containing 40                                                 | 1.53 | 0.0154 |
| <i>Zfp945</i>        | Zinc finger protein 945                                                                  | 1.53 | 0.0012 |
| <i>Serpinh5</i>      | Serine (or cysteine) peptidase inhibitor, clade B, member 5                              | 1.52 | 0.0424 |
| <i>Hspa1a</i>        | Heat shock protein 1A                                                                    | 1.52 | 0.0226 |
| <i>Sord</i>          | Sorbitol dehydrogenase                                                                   | 1.51 | 0.049  |
| <i>Slc4a2</i>        | Solute carrier family 4 (anion exchanger), member 2                                      | 1.51 | 0.0435 |
| <i>Vmn1r100</i>      | Vomerolateral 1 receptor 100                                                             | 1.51 | 0.0063 |
| <i>Vmn1r148</i>      | Vomerolateral 1 receptor 148                                                             | 1.51 | 0.0063 |
| <i>4930549C01Rik</i> | RIKEN cDNA 4930549C01 gene                                                               | 1.51 | 0.0157 |
| <i>Olfr191</i>       | Olfactory receptor 191                                                                   | 1.50 | 0.004  |

<sup>1</sup> Among 86 upregulated genes, 61 upregulated genes with < 2.0 and ≥ 1.5-fold change were showed. <sup>2</sup> Fold change in gene expression in pancreatic tumors of mice with Fx administration (group 1) compared to that of control mice (group 2). <sup>3</sup> Significant difference between groups 1 and 2 by an exact test on edge R.

3  
4  
5  
6  
7  
8

**Supplementary Table S2.** Profile of downregulated genes (> -2.0 and < -1.5-fold change) in pancreatic tumors of mice treated with fucoxanthin (Fx).<sup>1</sup>9  
10

| Gene symbol       | Description                                                                                                  | Fold change <sup>2</sup> | p-value <sup>3</sup> |
|-------------------|--------------------------------------------------------------------------------------------------------------|--------------------------|----------------------|
| Trpv6             | transient receptor potential cation channel, subfamily V, member 6                                           | -1.98                    | 0.0003               |
| Gpr183            | G protein-coupled receptor 183                                                                               | -1.95                    | 0.0046               |
| Itih5             | inter-alpha (globulin) inhibitor H5                                                                          | -1.94                    | 0.0427               |
| Dock10            | dedicator of cytokinesis 10                                                                                  | -1.94                    | 0.0207               |
| Ces2b             | carboxyesterase 2B                                                                                           | -1.91                    | 0.0383               |
| Zc3h12d           | zinc finger CCCH type containing 12D                                                                         | -1.86                    | 0.044                |
| Fam205a2; Gm10600 | family with sequence similarity 205, member A2; predicted gene 10600                                         | -1.83                    | 0.0098               |
| Slc7a14           | solute carrier family 7 (cationic amino acid transporter, y+ system), member 14                              | -1.82                    | 0.0147               |
| Syt15             | synaptotagmin-like 5                                                                                         | -1.77                    | 0.0053               |
| Stra6l            | STRA6-like                                                                                                   | -1.76                    | 0.0096               |
| Gimap9            | GTPase, IMAP family member 9                                                                                 | -1.73                    | 0.0152               |
| Il22ra1           | interleukin 22 receptor, alpha 1                                                                             | -1.71                    | 0.0419               |
| Ackr4             | atypical chemokine receptor 4                                                                                | -1.69                    | 0.0106               |
| Nov               | nephroblastoma overexpressed gene                                                                            | -1.68                    | 0.0371               |
| Fetub             | fetuin beta                                                                                                  | -1.68                    | 0.005                |
| Gnao1             | guanine nucleotide binding protein, alpha O                                                                  | -1.67                    | 0.0061               |
| Kcnh5             | potassium voltage-gated channel, subfamily H (eag-related), member 5                                         | -1.67                    | 0.0424               |
| Vnn3              | vanin 3                                                                                                      | -1.66                    | 0.0036               |
| St6galnac2        | ST6 (alpha-N-acetyl-neuraminyl-2,3-beta-galactosyl-1,3)-N-acetylglactosaminide alpha-2,6-sialyltransferase 2 | -1.66                    | 0.0006               |
| Aldh1a7           | aldehyde dehydrogenase family 1, subfamily A7                                                                | -1.66                    | 0.0136               |
| Far2              | fatty acyl CoA reductase 2                                                                                   | -1.66                    | 0.0426               |
| Trmt11            | tRNA methyltransferase 11                                                                                    | -1.65                    | 0.0433               |
| Mmp16             | matrix metalloproteinase 16                                                                                  | -1.65                    | 0.0055               |
| Gulo              | gulonolactone (L-) oxidase                                                                                   | -1.64                    | 0.028                |
| Fmo1              | flavin containing monooxygenase 1                                                                            | -1.63                    | 0.0065               |
| Pkib              | protein kinase inhibitor beta, cAMP dependent, testis specific                                               | -1.63                    | 0.0081               |
| Klk9              | kallikrein related-peptidase 9                                                                               | -1.63                    | 0.0035               |
| Cd79a             | CD79A antigen (immunoglobulin-associated alpha)                                                              | -1.62                    | 0.0231               |
| Olfir1058         | olfactory receptor 1058                                                                                      | -1.62                    | 0.0129               |
| Slc7a11           | solute carrier family 7 (cationic amino acid transporter, y+ system), member 11                              | -1.62                    | 0.0307               |
| Ppp4r4            | protein phosphatase 4, regulatory subunit 4                                                                  | -1.61                    | 0.0448               |
| Vmn2r44           | vomeroneural 2, receptor 44                                                                                  | -1.61                    | 0.0389               |
| Uts2              | urotensin 2                                                                                                  | -1.60                    | 0.0252               |
| Cygb              | cytoglobin                                                                                                   | -1.58                    | 0.026                |

|               |                                                                                 |       |        |
|---------------|---------------------------------------------------------------------------------|-------|--------|
| Sptbn2        | spectrin beta, non-erythrocytic 2                                               | -1.58 | 0.0212 |
| Slc4a8        | solute carrier family 4 (anion exchanger), member 8                             | -1.57 | 0.0097 |
| Slc35c2       | solute carrier family 35, member C2                                             | -1.57 | 0.0126 |
| Olfr610       | olfactory receptor 610                                                          | -1.56 | 0.0178 |
| Crb1          | crumbs family member 1, photoreceptor morphogenesis associated                  | -1.56 | 0.0013 |
| Gng11         | guanine nucleotide binding protein (G protein), gamma 11                        | -1.56 | 0.0212 |
| Sema6a        | sema domain, transmembrane domain (TM), and cytoplasmic domain, (semaphorin) 6A | -1.55 | 0.0262 |
| Cyp3a59       | cytochrome P450, family 3, subfamily a, polypeptide 59                          | -1.55 | 0.0107 |
| Enkur         | enkurin, TRPC channel interacting protein                                       | -1.54 | 0.0421 |
| Hdgfrp3       | hepatoma-derived growth factor, related protein 3                               | -1.54 | 0.0032 |
| Siglecg       | sialic acid binding Ig-like lectin G                                            | -1.53 | 0.0307 |
| Fam161a       | family with sequence similarity 161, member A                                   | -1.52 | 0.0042 |
| Plk2          | polo-like kinase 2                                                              | -1.52 | 0.0394 |
| Olfr44        | olfactory receptor 44                                                           | -1.51 | 0.0304 |
| Olfr1247      | olfactory receptor 1247                                                         | -1.51 | 0.0023 |
| Abca8a        | ATP-binding cassette, sub-family A (ABC1), member 8a                            | -1.50 | 0.0307 |
| Setd4         | SET domain containing 4                                                         | -1.50 | 0.0348 |
| 5031410I06Rik | RIKEN cDNA 5031410I06 gene                                                      | -1.50 | 0.0192 |

<sup>1</sup> Among all 88 downregulated genes significantly altered, 52 downregulated genes with > -2.0 and < -1.5-fold change were showed. <sup>2</sup> Fold change in gene expression in pancreatic tumors of mice with Fx administration (group 1) compared to that of control mice (group 2). <sup>3</sup> Significant difference between groups 1 and 2 by an exact test on edge R.

11  
12  
13  
14  
15  
16  
17  
18  
19  
20  
21
